1 The human *FLT1* regulatory element directs vascular expression and  
2 modulates angiogenesis pathways *in vitro* and *in vivo*

3  
4 Julian Stolper<sup>1,2</sup>, Holly K. Voges<sup>1</sup>, Michael See<sup>1</sup>, Neda Rahmani Mehdiabadi<sup>1,3</sup>, Gulrez Chahal<sup>3</sup>,  
5 Mark Drvodelic<sup>3,4</sup>, Michael Eichenlaub<sup>3</sup>, Tanya Labonne<sup>1</sup>, Benjamin G. Schultz<sup>5</sup>, Alejandro  
6 Hidalgo<sup>1</sup>, Lazaro Centanin<sup>6</sup>, Jochen Wittbrodt<sup>6</sup>, Enzo R. Porrello<sup>1,7</sup>, David A. Elliott<sup>1,2,3\*</sup> and  
7 Mirana Ramialison,<sup>1,3\*</sup>

8  
9 <sup>1</sup> Murdoch Children's Research Institute, Royal Children's Hospital, Flemington Road, Parkville,  
10 Victoria, 3052, Australia.

11 <sup>2</sup> Department of Paediatrics, The Royal Children's Hospital, The University of Melbourne,  
12 Parkville, Victoria, 3052, Australia.

13 <sup>3</sup> Australian Regenerative Medicine Institute and Systems Biology Institute Australia, Monash  
14 University, Clayton, Victoria 3800, Australia.

15 <sup>4</sup> University of Melbourne, Parkville, Victoria, 3010, Australia

16 <sup>5</sup>Centre for Neuroscience of Speech, Department of Audiology and Speech Pathology, Faculty  
17 of Medicine, Dentistry and Health Sciences, The University of Melbourne, Carlton, Victoria,  
18 3053, Australia

19 <sup>6</sup>Centre for Organismal Studies, Heidelberg University, Heidelberg, Germany

20 <sup>7</sup> Department of Physiology, School of Biomedical Sciences, The University of Melbourne,  
21 Parkville, Victoria, 3010, Australia.

22

23 \* Corresponding authors: Murdoch Children's Research Institute, Royal Children's Hospital,  
24 Flemington Road, Parkville, Victoria, 3052, Australia. Ph. +61 3 9936 6668. Fax. +61 3 9348 139.  
25 Email. [david.elliott@mcri.edu.au](mailto:david.elliott@mcri.edu.au); [mirana.ramialison@mcri.edu.au](mailto:mirana.ramialison@mcri.edu.au)

26

27 Julian Stolper: [julian.stolper@mcri.edu.au](mailto:julian.stolper@mcri.edu.au)

28 Holly K. Voges: [holly.voges@mcri.edu.au](mailto:holly.voges@mcri.edu.au)

29 Michael See: [michael.see@mcri.edu.au](mailto:michael.see@mcri.edu.au)

30 Neda Rahmani Mehdiabadi: [neda.rahmanimehdiaba@mcri.edu.au](mailto:neda.rahmanimehdiaba@mcri.edu.au)

31 Gulrez Chahal: [gulrez.chahal@monash.edu](mailto:gulrez.chahal@monash.edu)

32 Mark Drvodelic: [Mdrvodelic@student.unimelb.edu.au](mailto:Mdrvodelic@student.unimelb.edu.au)

33 Michael Eichenlaub: [michael.eichenlaub@monash.edu](mailto:michael.eichenlaub@monash.edu)

34 Tanya Labonne: [tanya.labonne@mcri.edu.au](mailto:tanya.labonne@mcri.edu.au)

35 Benjamin G. Schultz: [ben.schultz@unimelb.edu.au](mailto:ben.schultz@unimelb.edu.au)

36 Alejandro Hidalgo: [alejandro.hidalgogon@mcri.edu.au](mailto:alejandro.hidalgogon@mcri.edu.au)

37 Lazaro Centanin: [lazaro.centanin@cos.uni-heidelberg.de](mailto:lazaro.centanin@cos.uni-heidelberg.de)

38 Jochen Wittbrodt: [jochen.wittbrodt@cos.uni-heidelberg.de](mailto:jochen.wittbrodt@cos.uni-heidelberg.de)

39 Enzo R. Porrello: [Enzo.porrello@mcri.edu.au](mailto:Enzo.porrello@mcri.edu.au)

40 David A. Elliott: [david.elliott@mcri.edu.au](mailto:david.elliott@mcri.edu.au)

41 Mirana Ramialison: [mirana.ramialison@mcri.edu.au](mailto:mirana.ramialison@mcri.edu.au)

42

43 **Abstract**

44 There is growing evidence that mutations in non-coding *cis*-regulatory elements (CREs) disrupt  
45 proper development. However, little is known about human CREs that are crucial for  
46 cardiovascular development. To address this, we bioinformatically identified cardiovascular  
47 CREs based on the occupancy of the CRE by the homeodomain protein NKX2-5 and cardiac  
48 chromatin histone modifications. This search defined a highly conserved CRE within the *FLT1*  
49 locus termed *enFLT1*. We show that the human *enFLT1* is an enhancer capable of driving  
50 reporter transgene expression *in vivo* throughout the developing cardiovascular system of  
51 medaka. Deletion of the human *enFLT1* enhancer ( $\Delta enFLT1$ ) triggered molecular perturbations  
52 in extracellular matrix organisation and blood vessel morphogenesis *in vitro* in endothelial cells  
53 derived from human embryonic stem cells and vascular defects *in vivo* in medaka. These  
54 findings highlight the crucial role of the human *FLT1* enhancer and its function as a regulator  
55 and buffer of transcriptional regulation in cardiovascular development.

56

57 **Keywords:** enhanceropathies, VEGF signalling pathway, *FLT1* enhancer, VEGFR1, angiogenesis,  
58 blood vessel.

## 59 Introduction

60 Disruption of heart and major blood vessel formation during development results in congenital  
61 heart defects at birth and are a major factor underlying child mortality and morbidity (1). The  
62 development of the heart is strictly regulated by a tight network of genetic components (2)  
63 which when disrupted perturb normal heart development leading to disease. Genome wide  
64 association studies (GWAS) have been used to identify genes associated with CHD and begin  
65 to dissect the complex genetic architecture underlying heart development (3,4). Nevertheless,  
66 an established problem is definitively assigning pathogenicity to a given variant or single  
67 nucleotide polymorphism (SNP). Strikingly, the majority of SNPs associated with CHD are found  
68 in non-coding regions in the genome, highlighting the importance of *cis*-regulatory elements  
69 in developmental processes and disease (5,6). These regulatory elements (REs), such as  
70 enhancers, promote gene expression in a spatial temporal manner through the coordinated  
71 binding of specific transcription factors (TFs). However, since SNPs in such sequences can lead  
72 to disruptions in TF binding motifs and therefore have no impact on the protein sequence  
73 directly, it is challenging to pinpoint the how sequence alterations result in cardiac and blood  
74 vessel defects. Aberrations in regulatory elements can lead to the perturbation of a gene  
75 regulatory network which, in turn, causes genes to be over- or underexpressed, even for  
76 multiple targets at once. This ultimately results in enhanceropathies, a group of diseases  
77 caused by mutations in regulatory elements (7).

78

79 There is now mounting evidence that disrupted cardiovascular regulatory elements can impair  
80 heart development leading to disease (8–11). A prerequisite for functional studies to  
81 understand the effect of non-coding SNPs, is the accurate identification of the regulatory

82 regions in the human genome that are important for cardiac development and disease.  
83 Accessible datasets of the human genome, regulatory element associated chromatin marks  
84 (12,13), TF analyses (14) and chromatin capture experiments (15–17) provide valuable  
85 resources to define the human gene regulatory network in the heart. However, key challenges  
86 to identify non-coding elements relevant for disease remain. The search space is still large, for  
87 example, the current registry of human *cis*-regulatory elements in the Encode data set is  
88 comprised of 926,535 entries (18). Furthermore, it is crucial to have functional validation  
89 methods to determine both the sufficiency and necessity of a given human regulatory element  
90 for normal development (19).

91

92 In this study, we developed a bioinformatic pipeline to identify cardiac enhancers that are  
93 involved in development and disease with a particular focus on the highly conserved cardiac  
94 TF NKX2-5. NKX2-5 is essential for heart formation and homeostasis and is crucial for the  
95 development of heart muscle cells (14,20,21). Since mutations in NKX2-5 can lead to CHD (22),  
96 we reasoned that variants in NKX2-5 target enhancers may also impair cardiac development.  
97 By using datasets of histone modifications, evolutionary conservation and functional  
98 enrichment, we have identified a human enhancer of the *Fms Related Receptor Tyrosine Kinase*  
99 *1* gene (*FLT1* also known as *Vascular growth factor receptor1 (VEGFR1)*) termed *enFLT1*.  
100 Dysregulation of the *FLT1* genes leads to vascular abnormalities and cardiovascular phenotypes  
101 in fish, mice and humans (23–25). Despite extensive study of *FLT1* function, its regulatory  
102 network of enhancers has not been completely defined (26–28). How perturbations of these  
103 elements may alter the transcriptional regulation of *FLT1* has yet to be determined. Here we  
104 demonstrate that the human *enFLT1* enhancer was able to drive gene expression in  
105 cardiovascular tissues *in vivo* in medaka (*Oryzias latipes*). The deletion of the enhancer element

106 in endothelial cells derived from human embryonic stem cells revealed a molecular disruption  
107 which overlaps with *FLT1* gene loss-of-function. In addition, medaka *enFLT1* deletion resulted  
108 in impaired cardiovascular development *in vivo*. Thus, here we have defined a highly  
109 conserved *FLT1* enhancer and provide evidence that this enhancer plays an evolutionarily  
110 important role in the development of the cardiovascular system through the modulation of  
111 *FLT1* downstream pathways essential for blood vessel morphogenesis.

112

## 113 Results

114

### 115 Identification of *cis*-regulatory elements relevant for cardiac development and disease

116

117 In order to identify human *cis*-regulatory elements that are involved in cardiovascular  
118 development, we developed a bioinformatic pipeline to filter for sequences that were directly  
119 bound by NKX2-5, a TF essential for heart development (Fig 1a). We therefore made use of a  
120 previously generated dataset of NKX2-5 genomic targets identified in human pluripotent  
121 derived cardiomyocytes by chromatin immunoprecipitation sequencing (ChIP-seq) (14). From  
122 all of the ChIP-seq experiments, 20,879 regions were identified to be directly bound by NKX2-  
123 5. Since heart development is a highly conserved process, REs deeply embedded in such  
124 essential processes are under positive selective pressure compared to non-functional non-  
125 coding sequences to maintain correct activity (12). We therefore filtered these regions for high  
126 sequence conservation and obtained 62 sequences which were ultra-conserved across 100  
127 vertebrate species, from fish to human. Furthermore, in order to filter for sequences that were  
128 shown to be active REs, we used publicly available datasets of histone modification marks as a  
129 measure to obtain active cardiac enhancers(13). We identified 38 regions that showed histone

130 marks for active enhancers H3K4 monomethylation (H3K4me1) and H3K27 acetylation  
131 (H3K27ac). We further filtered these regions for those that could be associated with genes  
132 known to play a role in heart development. We identified 7 CREs associated with highly  
133 relevant genes expressed in the heart and deeply embedded in the genetic networks  
134 controlling heart development (Table S1). To further understand the mechanism of regulatory  
135 elements involved in cardiovascular development and to illustrate the evidence supporting our  
136 hypothesis, we set out to investigate an enhancer element located in the intron 10 of the gene  
137 *FLT1* (Fig. 1b).

138

### 139 The human enhancer of *FLT1* is able to drive cardiovascular gene expression *in vivo*

140

141 We set out to assess the *in vivo* function of the human enhancer sequence *enFLT1*, which has  
142 been validated to be bound by many TFs embedded in cardiovascular development (Fig. S1a).  
143 In order to determine whether the RE is able to drive GFP reporter gene expression in the  
144 heart, we cloned the enhancer in a modified ZED vector (29,30) to perform a transgenesis assay  
145 in medaka (Fig. S1b). Already established in the ENCODE project in 2012, medaka has been  
146 shown to be the ideal model to study human regulatory elements *in vivo* and is well suited for  
147 genetic engineering (12). Of 121 injected embryos, 52 embryos (43%) showed consistent GFP  
148 expression in the cardiovascular system (Fig. S1c). All GFP positive fish were raised and  
149 subsequently crossed to wildtype fish to obtain a stable transgenic line (Fig. 1c) denoted  
150 *enFLT1:GFP*. Characterisation of the *enFLT1:GFP* line revealed consistent expression in cardiac  
151 and endothelial tissues such as intersegmental vessels, dorsal aorta (Fig. 1c'), the outflow tract  
152 (Fig. 1d), blood vessels in the myocardium, the endocardium and the heart valves (Fig. 1d').

153 This demonstrates that *enFLT1* consisting of 358 bases is sufficient to drive GFP expression in  
154 endothelial and cardiac tissues *in vivo*.

155

### 156 Enhancer of *FLT1* is essential for pathways involved in blood vessel morphogenesis

157

158 To understand the effect of the *FLT1* enhancer on the gene regulatory network and its function  
159 in humans, we deleted the RE via CRISPR/Cas9 mediated gene editing (Fig. S2a) in human  
160 embryonic stem cells (hESC) (background line: H3, NKX2-5<sup>(eGFP/wt)</sup> (31)) to generate the  
161  $\Delta enFLT1$  line, which was subsequently differentiated into endothelial cells. In order to  
162 understand the effects of the enhancer deletion on *FLT1* and its related pathways, we also  
163 generated a gene mutant cell line,  $\Delta ex1FLT1$  to act as a positive control. To understand the  
164 transcriptional consequences of deleting *enFLT1* (Fig. 2a) we performed RNA sequencing on  
165 wildtype,  $\Delta enFLT1$  and  $\Delta ex1FLT1$  endothelial cells derived from hESC after 12 days of culturing.  
166 Deletion of the enhancer had only a minor, not significant reduction on *FLT1* mRNA expression  
167 (Fig. S2b) despite evidence from chromatin conformation capture data (32) that *enFLT1*  
168 interacts with the *FLT1* promoter in cardiac cells (Fig. S2c). The removal of exon 1 of the gene  
169 however resulted in a truncated transcript (Fig. S2d). Nonetheless, when assessing the  
170 expression of different *FLT1* isoforms in  $\Delta enFLT1$ , we could not detect a significant decrease in  
171 transmembrane bound *FLT1* (*tFLT1*) expression (201) nor any difference in expression levels of  
172 any of the soluble *FLT1* (*sFLT1*) isoforms (204/207), suggesting a more redundant, subtle role  
173 of the CRE in *FLT1* regulation. However, deletion of exon 1 of *FLT1* had a significant effect on  
174 expression of both, transmembrane and soluble isoforms (Fig. 2b), highlighting *FLT1*  
175 dysregulation. Furthermore, we identified 211 differentially expressed genes (DEGs) as a result  
176 of deleting the regulatory element compared to cells with the intact wildtype *enFLT1*. The



177 majority of these DEGs (179) overlapped with the 2261 identified genes which were  
178 differentially expressed in the human *FLT1* gene mutant, suggesting an essential role of the  
179 enhancer in the FLT1 pathway (Fig. 2c). Furthermore, for the first time, we looked at gene  
180 ontology (GO) terms of the DEGs in a human *FLT1* gene mutant and found that the main  
181 pathways affected were blood vessel development, cell differentiation, cell division, heart  
182 development and extra cellular matrix organisation consistent with the molecular function of  
183 FLT1 (25,33). The genes shared by gene mutant and enhancer mutant human cell lines were  
184 involved in pathways such as organelle fission and extracellular structure organisation and  
185 other regulatory processes of extracellular matrix (ECM) composition. Pathways identified to  
186 be unique to differentially expressed genes in  $\Delta enFLT1$  were also found to be involved in  
187 angiogenesis and blood vessel morphogenesis, suggesting a role of *enFLT1* in alternative  
188 pathways in blood vessel development distinct from the FLT1 pathway (Fig. 2d and S2e).

189

#### 190 Deletion of *enFLT1* does not impair angiogenesis *in vitro*

191

192 In order to assess the potential of  $\Delta enFLT1$  and  $\Delta ex1FLT1$  endothelial cells to form tubes *in*  
193 *vitro*, we performed angiogenesis assays (34). Cells were labelled with anti-human CD31 and  
194 anti-human CD34 antibodies and imaged over the course of 48 hours (Fig. 3a). While wildtype  
195 (*NKX2-5<sup>eGFP/wt</sup>*) and  $\Delta enFLT1$  endothelial cells formed tubes within 10h and then stopped and  
196 coalesced, we observed a continuation of angiogenesis and proliferation in  $\Delta ex1FLT1$  cells until  
197 48h (Fig. 3b). To assess difference in tube formation potential across genotypes, we analysed  
198 skeleton length, area, junction count and branch count over the course of 48h (Fig. 3c and  
199 S3a).  $\Delta enFLT1$  cells showed no significant difference compared to wildtype cells in any of the  
200 categories assessed. However, we did see a significant change in area and skeleton length

201 when comparing  $\Delta ex1FLT1$  with the other cell lines (Fig. 3d), indeed suggesting a disruption of  
202 the *FLT1* pathway during angiogenesis consistent with published data on *FLT1* knockdown in  
203 HUVECS and *Flt1*<sup>-/-</sup> mutant in endothelial cells derived from murine embryonic stem cells (23).  
204 This data suggests the enhancer of *FLT1* is not essential for endothelial tube formation *in vitro*  
205 and that other regulatory elements act to buffer *FLT1* expression from the loss of *enFLT1*.  
206 Nevertheless, given the altered transcriptional profile observed in  $\Delta enFLT1$  endothelial cells it  
207 remains possible that this enhancer is required for normal development.

208

### 209 Deletion of *enFLT1* perturbs cardiovascular development *in vivo*

210

211 To determine if loss of the conserved *FLT1* enhancer alters vasculogenesis *in vitro* we deleted  
212 the endogenous *enflt1* in medaka and assessed the effect on blood vessel development or  
213 morphology. In order to alter the regulatory sequence, which was located in intron 10 of the  
214 *tflt1* isoform and the 3'UTR of the *sflt1* isoform in medaka (Fig. 1b), we made use of the  
215 CRISPR/Cas9 System to introduce a 270 bp deletion (Fig. 3e). The excision of the endogenous  
216 RE fragment in medaka (*enflt1*) was verified by PCR (Fig. S3b) and injected embryos were  
217 analysed for defects in heart or blood vessel formation. To rule out an effect of the Cas9  
218 enzyme or the process of microinjection itself on heart and blood vessel formation, controls  
219 were injected to target *oca2*, a gene important for pigment formation in the eye and body (35).  
220 Interestingly, embryos injected with the sgRNA targeting *enflt1* (Fig. 3f and g) resulted in a  
221 significant higher number of blood clots (14.68%) on the yolk in compared to control embryos  
222 (5.81%) (p value=0.0215, Mann-Whitney test, one-tailed) suggesting a crucial role of this  
223 sequence in angiogenesis and vascularisation *in vivo* in fish.

224

## 225 Discussion

226

227 FLT1 is an important regulator of blood vessel development, cell proliferation, migration,  
228 differentiation and cell survival (36). Loss of FLT1 or perturbation of *Flt1* regulation has been  
229 implicated in blood vessel defects in human, mouse, and zebrafish (23–25). Given that blood  
230 vessels are throughout the body, *FLT1* regulation is likely to be complex incorporating both  
231 tissue specific cues and endothelial cell type signals. Indeed, the precise combination of  
232 transcriptional regulators that bind at the regulatory elements of the *FLT1* locus are not well  
233 understood. However, a few studies have highlighted the importance of *FLT1* cis-regulatory  
234 elements and suggested that disruptions in these non-coding regulators affect gene expression  
235 of *FLT1* and its isoforms and can ultimately lead to disease (26,28,37,38).

236

237 We aimed to functionally test regulatory elements which were linked to cardiovascular  
238 development and disease in humans and identified an enhancer in intron 10 of *FLT1*. This  
239 enhancer is well conserved across species suggesting it plays a critical role in modulating *FLT1*  
240 expression levels. For example, the endogenous zebrafish *enFlt1* enhancer in combination with  
241 the endogenous *flt1* promoter is able to drive transgenic reporter gene expression throughout  
242 the developing vasculature *in vivo* (27). Here we demonstrate that the human *enFLT1* was also  
243 able to drive stable reporter gene expression in combination with a synthetic minimal  
244 promoter (SCP1) (39). In human endothelial cells derived from  $\Delta$ *enFLT1* hESCs levels of *FLT1*  
245 were only slightly reduced from wildtype levels. Previous studies have shown that the deletion  
246 of cis-regulatory elements, despite their capacity to drive gene expression, may only lead to  
247 subtle effects on transcription levels or phenotype (40). This occurs due to the fact that  
248 genomic regulatory domains often act additively to provide genetic and phenotypic robustness

249 during the development of an organism (9,40–43). Therefore, we hypothesize that other  
250 regulatory elements in the locus functionally compensate for *enFLT1* to maintain stable *FLT1*  
251 expression. Nevertheless, the transcriptional profile of endothelial cells is perturbed in the  
252 *enFLT1* knockout suggesting the enhancer may provide robustness during vessel  
253 morphogenesis. Supporting this idea is that the *in vivo* knockout of the endogenous conserved  
254 enhancer in medaka led to an increase of blood vessel disruptions on the yolk resulting in blood  
255 clot formation, hinting towards an important role of this sequence in vessel morphogenesis in  
256 fish (9,40–43).

257

258 Using an *in vitro* angiogenesis model we observed vessel collapse and a reduced rate of  
259 retraction of vessels in the human *FLT1* gene mutant cell line that was consistent with previous  
260 reports (23), however, this phenotype was not recapitulated in  $\Delta$ *enFLT1* lines. These *in vitro*  
261 experiments might be not be the appropriate assay of enhancer function. An *in vivo*  
262 mammalian system could provide more insight into determining if the *FLT1* enhancer is  
263 integrated into transcriptional networks during organogenesis rather than angiogenesis. For  
264 example, the enhancer may have key regulatory roles during cardiac development given the  
265 strategy to identify the enhancer used sequences targeted by the cardiac transcription factor  
266 NKX2-5. Interestingly we do see an effect of the deletion of the RE in medaka *in vivo*. In fish,  
267 the conserved enhancer lies in the 3'UTR of the *sflt1* isoform, which might lead to premature  
268 degradation of the mRNA and, therefore, may have a stronger effect on vessel morphogenesis.

269

270 Genes differentially expressed in  $\Delta$ *enFLT1* are involved in blood vessel morphogenesis and  
271 cardiovascular development via the regulation of the extracellular matrix composition.

272 Supporting the notion that the *enFLT1* is a critical regulatory element we also observed 33  
273 DEGs, which did not overlap with DEGs in  $\Delta ex1FLT1$ , that require an intact enhancer. Among  
274 these genes, ANGPT1 is involved in angiogenesis and disruptions in the gene have been  
275 associated with angioedema (44,45). As an antagonist of angiogenesis, FLT1 has been  
276 predicted to be a functional partner of ANGPT1 (46). While the most straightforward  
277 explanation is that sub-optimal *FLT1* expression in  $\Delta enFLT1$  endothelial cells impairs these  
278 pathways, a more speculative hypothesis is that the enhancer acts in *trans* to regulate this  
279 subset of genes. However, in order to fully understand the interaction network of the enhancer  
280 with other genes, 3D interaction data of the enhancer is required to identify putative physical  
281 interaction partners.

282

283 In this study we have defined an evolutionarily conserved enhancer element that permits  
284 further dissection of the complex regulatory program controlling of *FLT1* expression. This study  
285 provides novel cellular and animal models to further study this enhancer element and provides  
286 a striking example of the robustness of the transcriptional network that enables the precise  
287 expression of *FLT1*. In conclusion, we show that perturbations in the sequence of a regulatory  
288 element of *FLT1* compromises the FLT1/VEGF signalling cascade impairing both transcriptional  
289 profiles and blood vessel formation. In this context, this work provides a framework for  
290 identifying other *FLT1* regulatory sequences that facilitate the complex interplay of spatial and  
291 temporal cues provided to the cells of the vasculature throughout the body.

292

293

294

## 295 Methods

296

### 297 Bioinformatic mining and enhancer prediction

298 Sequences bound by NKX2-5 were retrieved from Anderson et al (14), filtered for ultra-  
299 conserved sequences via MultiZ alignments (47) and intersected with histone modification  
300 marks datasets the Human Roadmap Epigenome Project (48). The GREAT tool (49) was used  
301 to link enhancer candidates to target genes based on proximity rules.

302

### 303 Fish maintenance and ethics

304

305 Fish lines were maintained under standard recirculating aquaculture conditions. Day-night  
306 cycles were set to 14 h of light and 10h of darkness. The whole fish facility is under the  
307 supervision of the local representative of the animal welfare agency and all experiments on  
308 Medaka (*Oryzias latipes*) were performed according to European Union animal welfare  
309 guidelines and national animal welfare standards in Germany (Tierschutzgesetz §11, Abs. 1,  
310 Nr.1, husbandry permit number AZ35-9185.64/BH Wittbrodt, line generation permit number  
311 AZ 35-9185.81/G-145-15). The wildtype strain Cab was used in this study.

312

### 313 Enhancer assay and generation of transgenic lines

314

315 The reporter line *enFLT1:GFP* was generated by injection of 5ng/μl donor DNA and 10 ng/μl  
316 Tol2 transposase mRNA into one cell stage medaka embryos. For transgenesis using the  
317 Meganuclease Scel, the injection mix consisted of 0.5x Yamamoto buffer, 0.5x I-SceI buffer, 0.3  
318 U/μl I-SceI enzyme and 10-20n/μl of the donor constructs. The injected plasmid was a modified

319 zebrafish enhancer detection plasmid (29,30) containing a SCP1 promoter (39). The enhancer  
320 element was amplified using these primers: trans\_enflt1\_for: TTAGGGGGAGGGGAATGTGC;  
321 trans\_enflt1\_rev: CCTCCCTGCCATTGTACTTGG.

322

### 323 Imaging *in vivo*

324

325 Medaka hatchlings (sedated with tricaine when alive) were mounted in 1% low melting agarose  
326 on glass bottom MatTek dishes. High-resolution imaging was carried out using confocal laser  
327 scanning microscopes (Leica TCS SPE or Leica TCS SP8). Analysis and processing were  
328 performed using the ImageJ software.

329

### 330 Gene editing *in vivo*

331

332 Suitable sgRNAs with low predicted off targets were designed using the CRISPR/Cas9 target  
333 online predictor (CCTop) (50). Cas9 mRNA was transcribed from JDS246 by mMessage  
334 mMachine Sp6 Transcription Kit (Thermo Fisher) and sgRNA were cloned into DR274 (Addgene  
335 #42250) (51). DR274 was linearized using the restriction enzyme Dral and subsequently  
336 transcribed using MEGAscript T7 transcription Kit (Thermo Fisher). RNA purification was  
337 performed using the RNeasy Mini kit (Qiagen). One-cell medaka embryos were injected with  
338 150 ng/ $\mu$ l Cas9 mRNA and 15 ng/ $\mu$ l per sgRNA used.  $\Delta$ enflt1\_sgRNA1:  
339 CCAGACCCAACAGTGGACCC;  $\Delta$ enflt1\_sgRNA2: GGGCTTGAGAGGTATGTGCT;  $\Delta$ oca2\_sgRNA1:  
340 TTGCAGGAATCATTCTGTGT;  $\Delta$ oca2\_sgRNA2: GATCCAAGTGGAGCAGACTG (35).

341

### 342 Gene editing *in vitro*

343

344 sgRNA oligos were cloned into px458 (Addgene #48138) and subsequently transfected via  
345 electroporation using 100µl Neon<sup>®</sup> Tips. Human embryonic stem cells were electroporated at  
346 1050V for 30ms with 2 pulses. Cells transiently expressing GFP were single cell sorted, colonies  
347 were grown for 2 weeks and screened via PCR.  $\Delta$ enFLT1\_sgRNA1: TAAGGGCACAAGCCCTAGTA;  
348  $\Delta$ enFLT1\_sgRNA2: ACCTGAAACAACCTTAATTT;  $\Delta$ ex1FLT1\_sgRNA1: TAGTTGCAGCGGGCACGCTT;  
349  $\Delta$ ex1FLT1\_sgRNA2: TTATAAATCGCCCCCGCCCT.

350

### 351 Cell culture and endothelial cell differentiation

352

353 HESCs (background line: H3, NKX2-5<sup>(eGFP/wt)</sup>) were cultured on feeders and passaged as  
354 previously described (31). Endothelial cell differentiation was induced by using an adapted  
355 cardiomyocyte protocol (14).  $2.2 \times 10^6$  cells were seeded per well on 6-well plates coated with  
356 Geltrex (Life Technologies). On day 0, the standard cardiac differentiation medium contained  
357 12µM CHIR99021, 80ng/ml Activin A and 50µg/ml Ascorbic Acid. For day 3 and day 5, the  
358 standard media was supplemented with 5µM IWR-1, 50µg/ml Ascorbic Acid, 30ng/ml VEGF  
359 (PeproTech) and 50ng/ml SCF (PeproTech). At day 6 the cells were harvested and processed  
360 for flow cytometry sorting. The suspension was stained for the endothelial specific cell surface  
361 markers CD31 and CD34 to sort for endothelial progenitors. The antibodies anti-human CD31-  
362 APC (BioLegend) and anti-human CD34-PE/Cy7 (BioLegend) were used in a 1:400 ratio.  
363 Endothelial cells were maintained in endothelial growth medium, EGM2-2MV Bulletkit (Lonza).

364

### 365 Angiogenesis assay

366



367 Vessel formation assays or angiogenesis assays were performed as previously published (34).  
368 In brief, 40µl of Geltrex™ were added to each well of a 96 well glass bottom plates (Corning).  
369 The plates were kept on ice while pipetting, subsequently centrifuged and left to set in the  
370 incubator at 37°C for 30min. Endothelial cells were harvested and resuspended in complete  
371 growth factor EGM-2V media supplemented with anti-human CD31-APC and anti-human  
372 CD34-PE/Cy7 antibodies (1:400). 15,000 cells were plated per well.

373

### 374 Imaging and Image analysis

375

376 Confocal images were acquired with Yokagawa CellVoyager CV8000 high-throughput discovery  
377 system under 37°C and 5% CO<sub>2</sub>. Maximum intensity projection (MIP) images were constructed  
378 from 15µm z slices (300µm total z distance), captured every 40 minutes for 48 hours. Images  
379 were analysed in CellPathfinder software based on CD34-APC intensity. Analysis algorithm was  
380 defined using skeleton function to generate the parameters vessel area, vessel length, branch  
381 count, and junction count. The Kruskal-Wallis test was used to evaluate differences in medians  
382 among three cell lines. If the Kruskal-Wallis test was significant, the Wilcoxon Rank Sum Test  
383 was used to assess the level of difference significance on a variable between two cell lines. The  
384 statistical analysis was performed in the R statistical programming language.

385

### 386 RNA sequencing and analysis

387

388 Three biological replicates with each three technical replicates (per cell line) of endothelial cells  
389 were harvested 12 days after differentiation initiation. RNA was extracted using the Direct-Zol  
390 RNA Miniprep Kit (Zymo research). Paired-end mRNA sequencing was performed at the

391 Victorian Clinical Genetics Services (VCGS) using the NovaSeq 6000 System (Illumina) with a 2  
392 x 150 bp read length. The fastq files were processed using the RNAsik pipeline (52). The STAR  
393 aligner (53) was used to align reads to the GRCh38 Assembly. Aligned reads were assigned to  
394 features from the GRCh38 EnsEMBL Annotation (54) using the featureCounts program from  
395 RsubRead (55). Degust (56) was used to perform and visualise differential expression analysis.  
396 Firstly, the first dimension of unwanted variation were removed from counts using RUVr  
397 routine from the RUVSeq R package (57). Next, TMM normalisation and the quasi-likelihood  
398 test was performed using EdgeR's (58) standard workflow.  
399 Salmon (59) was used to quantify transcript isoforms abundance, and the differential  
400 abundance of FLT1 was tested and visualised using the DRIMSeq R Package (60).

401

## 402 **Declarations**

403 **Ethics approval and consent to participate.** No ethics approval and consent required for this  
404 study.

405 **Consent for publication.** All authors provide consent for publication.

406 **Competing interests.** The authors declare no competing financial interests.

407 **Funding.** This work was supported by a 0 (1180905), the Royal Children's Hospital Foundation  
408 as well as the Stafford Fox Foundation. The Australian Regenerative Medicine Institute is  
409 supported by grants from the State Government of Victoria and the Australian Government.

## 410 **Authors' contributions.**

411 MR designed the study with input from DE and ME. JS performed *in vivo* and *in vitro*  
412 experiments with input from TL, LC, JW, EP, DE and MR. JS and HV performed imaging and data  
413 analysis with input from AH. MR, ME, MD, MS, JS, NRM and BS performed bioinformatics and

414 statistical analysis. JS, MR and DE wrote the manuscript with input from all authors. All authors  
415 reviewed and approved the manuscript.

416

417 **Availability of data and materials.** The RNA-seq dataset is accessible through NCBI Gene  
418 Expression Omnibus, GEO160873.

419

420 **Acknowledgments.** We thank Jeannette Hallab, Karen Gross, Kathy Karavendzas, Francesca  
421 Bolk, Markus Tondl, Ling Qian and Sebastian-Alexander Stamatis for support in laboratory work  
422 and advice. Choon Boon (Evangelyn) Sim, Ali Seleit, James McNamara and Christine Wells for  
423 scientific discussions and guidance. We are grateful to Jose Arturo Gutierrez-Triana for  
424 providing the transgenesis vector. We would also like to thank the Victorian Clinical Genetics  
425 Services (VCGS) for providing the RNA-seq service and the MCRI FACS facility for technical  
426 assistance. Furthermore, we would like to thank all members of the Centanin, Elliott, Porrello,  
427 Wittbrodt and Ramialison laboratory members for active discussions and feedback. The  
428 Australian Regenerative Medicine Institute is supported by grants from the State Government  
429 of Victoria and the Australian Government.

430

## 431 **References**

432

- 433 1. Virani SS, Alonso A, Benjamin EJ, Bittencourt MS, Callaway CW, Carson AP, et al. Heart  
434 disease and stroke statistics—2020 update: A report from the American Heart  
435 Association. Vol. 141, *Circulation*. Lippincott Williams and Wilkins; 2020. p. E139–596.
- 436 2. Edwards JJ, Gelb BD. Genetics of congenital heart disease. *Curr Opin Cardiol*. 2016

- 437 May;31(3):235–41.
- 438 3. Agopian AJ, Goldmuntz E, Hakonarson H, Sewda A, Taylor D, Mitchell LE. Genome-Wide  
439 Association Studies and Meta-Analyses for Congenital Heart Defects. *Circ Cardiovasc*  
440 *Genet.* 2017 Jun 1;10(3):e001449.
- 441 4. Wang Y, Wang J-G. Genome-Wide Association Studies of Hypertension and Several  
442 Other Cardiovascular Diseases. *Pulse.* 2018;6(3–4):169–86.
- 443 5. Corradin O, Scacheri PC. Enhancer variants: evaluating functions in common disease.  
444 *Genome Med.* 2014 Oct 28;6(10):85.
- 445 6. Chahal G, Tyagi S, Ramialison M. Navigating the non-coding genome in heart  
446 development and Congenital Heart Disease. Vol. 107, *Differentiation*. Elsevier Ltd; 2019.  
447 p. 11–23.
- 448 7. Smith E, Shilatifard A. Enhancer biology and enhanceropathies. *Nat Struct Mol Biol.* 2014  
449 Mar 1;21(3):210–9.
- 450 8. May D, Blow MJ, Kaplan T, McCulley DJ, Jensen BC, Akiyama JA, et al. Large-scale  
451 discovery of enhancers from human heart tissue. *Nat Genet.* 2012 Jan 4;44(1):89–93.
- 452 9. van den Boogaard M, van Weerd JH, Bawazeer AC, Hooijkaas IB, van de Werken HJG,  
453 Tessadori F, et al. Identification and Characterization of a Transcribed Distal Enhancer  
454 Involved in Cardiac *Kcnh2* Regulation. *Cell Rep.* 2019 Sep 3;28(10):2704-2714.e5.
- 455 10. Dickel DE, Barozzi I, Zhu Y, Fukuda-Yuzawa Y, Osterwalder M, Mannion BJ, et al.  
456 Genome-wide compendium and functional assessment of in vivo heart enhancers. *Nat*  
457 *Commun.* 2016 Oct 5;7:12923.
- 458 11. van Ouwkerk AF, Bosada FM, van Duijvenboden K, Hill MC, Montefiori LE, Scholman  
459 KT, et al. Identification of atrial fibrillation associated genes and functional non-coding  
460 variants. *Nat Commun.* 2019 Dec 1;10(1).

- 461 12. ENCODE Project Consortium. An integrated encyclopedia of DNA elements in the human  
462 genome. *Nature*. 2012 Sep 6;489(7414):57–74.
- 463 13. Roadmap Epigenomics Consortium, Kundaje A, Meuleman W, Ernst J, Bilenky M, Yen A,  
464 et al. Integrative analysis of 111 reference human epigenomes. *Nature*. 2015 Feb  
465 19;518(7539):317–29.
- 466 14. Anderson DJ, Kaplan DI, Bell KM, Koutsis K, Haynes JM, Mills RJ, et al. NKX2-5 regulates  
467 human cardiomyogenesis via a HEY2 dependent transcriptional network. *Nat Commun*.  
468 2018;9(1):1–13.
- 469 15. Arvanitis M, Tampakakis E, Zhang Y, Wang W, Auton A, Agee M, et al. Genome-wide  
470 association and multi-omic analyses reveal ACTN2 as a gene linked to heart failure. *Nat*  
471 *Commun*. 2020 Dec 1;11(1):1122.
- 472 16. Montefiori LE, Sobreira DR, Sakabe NJ, Aneas I, Joslin AC, Hansen GT, et al. A promoter  
473 interaction map for cardiovascular disease genetics. *Elife*. 2018;7:1–35.
- 474 17. Bertero A, Fields PA, Ramani V, Bonora G, Yardimci GG, Reinecke H, et al. Dynamics of  
475 genome reorganization during human cardiogenesis reveal an RBM20-dependent  
476 splicing factory. *Nat Commun*. 2019 Dec 1;10(1):1–19.
- 477 18. ENCODE Encyclopedia, Version 4: Genomic annotations – ENCODE [Internet]. [cited  
478 2020 Oct 30]. Available from: <https://www.encodeproject.org/data/annotations/>
- 479 19. Catarino RR, Stark A. Assessing sufficiency and necessity of enhancer activities for gene  
480 expression and the mechanisms of transcription activation. *Genes Dev*. 2018;32(3–  
481 4):202–23.
- 482 20. Bouveret R, Waardenberg AJ, Schonrock N, Ramialison M, Doan T, de jong D, et al. NKX2-  
483 5 mutations causative for congenital heart disease retain functionality and are directed  
484 to hundreds of targets. *Elife*. 2015 Jul 6;4(JULY2015).

- 485 21. Lyons GE. Vertebrate heart development. *Curr Opin Genet Dev.* 1996 Aug 1;6(4):454–  
486 60.
- 487 22. Schott JJ, Benson DW, Basson CT, Pease W, Silberbach GM, Moak JP, et al. Congenital  
488 heart disease caused by mutations in the transcription factor NKX2-5. *Science* (80- ).  
489 1998 Jul 3;281(5373):108–11.
- 490 23. Nesmith JE, Chappell JC, Cluceru JG, Bautch VL. Blood vessel anastomosis is spatially  
491 regulated by Flt1 during angiogenesis. *Development.* 2017;144(5).
- 492 24. Krueger J, Liu D, Scholz K, Zimmer A, Shi Y, Klein C, et al. Flt1 acts as a negative regulator  
493 of tip cell formation and branching morphogenesis in the zebrafish embryo.  
494 *Development.* 2011 May;138(10):2111–20.
- 495 25. Fong GH, Rossant J, Gertsenstein M, Breitman ML. Role of the Flt-1 receptor tyrosine  
496 kinase in regulating the assembly of vascular endothelium. *Nature.* 1995 Jul  
497 6;376(6535):66–70.
- 498 26. Kikas T, Inno R, Ratnik K, Rull K, Laan M. C-allele of rs4769613 Near FLT1 Represents a  
499 High-Confidence Placental Risk Factor for Preeclampsia. *Hypertens (Dallas, Tex 1979).*  
500 2020 Sep 1;76(3):884–91.
- 501 27. Bussmann J, Bos FL, Urasaki A, Kawakami K, Duckers HJ, Schulte-Merker S. Arteries  
502 provide essential guidance cues for lymphatic endothelial cells in the zebrafish trunk.  
503 *Development.* 2010 Aug 15;137(16):2653–7.
- 504 28. Menendez D, Krysiak O, Inga A, Krysiak B, Resnick MA, Schönfelder G. A SNP in the flt-1  
505 promoter integrates the VEGF system into the p53 transcriptional network. *Proc Natl  
506 Acad Sci U S A.* 2006 Jan 31;103(5):1406–11.
- 507 29. Bessa J, Tena JJ, De La Calle-Mustienes E, Fernández-Miñán A, Naranjo S, Fernández A,  
508 et al. Zebrafish Enhancer Detection (ZED) vector: A new tool to facilitate transgenesis

- 509 and the functional analysis of cis-regulatory regions in zebrafish. *Dev Dyn*.  
510 2009;238(9):2409–17.
- 511 30. Gutierrez-Triana JA, Herget U, Castillo-Ramirez LA, Lutz M, Yeh C-M, De Marco RJ, et al.  
512 Manipulation of Interrenal Cell Function in Developing Zebrafish Using Genetically  
513 Targeted Ablation and an Optogenetic Tool. *Endocrinology*. 2015 Sep 1;156(9):3394–  
514 401.
- 515 31. Elliott DA, Braam SR, Koutsis K, Ng ES, Jenny R, Lagerqvist EL, et al. NKX2-5 eGFP/w hESCs  
516 for isolation of human cardiac progenitors and cardiomyocytes. *Nat Methods*. 2011  
517 Dec;8(12):1037–43.
- 518 32. Zhang Y, Li T, Preissl S, Amaral ML, Grinstein JD, Farah EN, et al. Transcriptionally active  
519 HERV-H retrotransposons demarcate topologically associating domains in human  
520 pluripotent stem cells. *Nat Genet*. 2019 Sep 1;51(9):1380–8.
- 521 33. Chen TT, Luque A, Lee S, Anderson SM, Segura T, Iruela-Arispe ML. Anchorage of VEGF  
522 to the extracellular matrix conveys differential signaling responses to endothelial cells.  
523 *J Cell Biol*. 2010 Feb 22;188(4):595–609.
- 524 34. Arnaoutova I, Kleinman HK. In vitro angiogenesis: Endothelial cell tube formation on  
525 gelled basement membrane extract. *Nat Protoc*. 2010 Apr;5(4):628–35.
- 526 35. Lischik CQ, Adelman L, Wittbrodt J. Enhanced in vivo-imaging in medaka by optimized  
527 anaesthesia, fluorescent protein selection and removal of pigmentation. Winkler C,  
528 editor. *PLoS One*. 2019 Mar 7;14(3):e0212956.
- 529 36. Simons M, Gordon E, Claesson-Welsh L. Mechanisms and regulation of endothelial VEGF  
530 receptor signalling. Vol. 17, *Nature Reviews Molecular Cell Biology*. Nature Publishing  
531 Group; 2016. p. 611–25.
- 532 37. Thomas CP, Raikwar NS, Kelley EA, Liu KZ. Alternate processing of Flt1 transcripts is

- 533 directed by conserved cis-elements within an intronic region of FLT1 that reciprocally  
534 regulates splicing and polyadenylation. *Nucleic Acids Res.* 2010 Apr 10;38(15):5130–40.
- 535 38. Owen LA, Morrison MA, Ahn J, Woo SJ, Sato H, Robinson R, et al. FLT1 genetic variation  
536 predisposes to neovascular AMD in ethnically diverse populations and alters systemic  
537 FLT1 expression. *Investig Ophthalmol Vis Sci.* 2014 May 8;55(6):3543–54.
- 538 39. Juven-Gershon T, Cheng S, Kadonaga JT. Rational design of a super core promoter that  
539 enhances gene expression. *Nat Methods.* 2006 Nov 23;3(11):917–22.
- 540 40. Cunningham TJ, Lancman JJ, Berenguer M, Dong PDS, Duester G. Genomic Knockout of  
541 Two Presumed Forelimb Tbx5 Enhancers Reveals They Are Nonessential for Limb  
542 Development. *Cell Rep.* 2018;23(11):3146–51.
- 543 41. Osterwalder M, Barozzi I, Tissières V, Fukuda-Yuzawa Y, Mannion BJ, Afzal SY, et al.  
544 Enhancer redundancy provides phenotypic robustness in mammalian development.  
545 *Nature.* 2018;554(7691):239–43.
- 546 42. Letelier J, De La Calle-Mustienes E, Pieretti J, Naranjo S, Maeso I, Nakamura T, et al. A  
547 conserved Shh cis-regulatory module highlights a common developmental origin of  
548 unpaired and paired fins. *Nat Genet.* 2018;50(4):504–9.
- 549 43. Sarro R, Kocher AA, Emera D, Uebbing S, Dutrow E V., Weatherbee SD, et al. Disrupting  
550 the three-dimensional regulatory topology of the Pitx1 locus results in overtly normal  
551 development. *Dev.* 2018 Apr 1;145(7).
- 552 44. Bafunno V, Firinu D, D’Apolito M, Cordisco G, Loffredo S, Leccese A, et al. Mutation of  
553 the angiopoietin-1 gene (ANGPT1) associates with a new type of hereditary  
554 angioedema. *J Allergy Clin Immunol.* 2018 Mar 1;141(3):1009–17.
- 555 45. d’Apolito M, Santacroce R, Colia AL, Cordisco G, Maffione AB, Margaglione M.  
556 Angiopoietin-1 haploinsufficiency affects the endothelial barrier and causes hereditary



- 557            angioedema. *Clin Exp Allergy*. 2019 May 1;49(5):626–35.
- 558    46.    FLT1 protein (*Sus scrofa*) - STRING interaction network [Internet]. [cited 2020 Oct 31].  
559            Available from: <https://string-db.org/network/9823.ENSSSCP00000009946>
- 560    47.    Multiz Alignments Multiz Align Track Settings [Internet]. [cited 2020 Oct 31]. Available  
561            from: <http://genome.ucsc.edu/cgi-bin/hgTrackUi?db=hg19&g=multiz100way>
- 562    48.    Kundaje A, Meuleman W, Ernst J, Bilenky M, Yen A, Heravi-Moussavi A, et al. Integrative  
563            analysis of 111 reference human epigenomes. *Nature*. 2015 Feb 18;518(7539):317–30.
- 564    49.    McLean CY, Bristor D, Hiller M, Clarke SL, Schaar BT, Lowe CB, et al. GREAT improves  
565            functional interpretation of cis-regulatory regions. *Nat Biotechnol*. 2010 May  
566            2;28(5):495–501.
- 567    50.    Stemmer M, Thumberger T, del Sol Keyer M, Wittbrodt J, Mateo JL. CCTop: An Intuitive,  
568            Flexible and Reliable CRISPR/Cas9 Target Prediction Tool. Maas S, editor. *PLoS One*. 2015  
569            Apr 24;10(4):e0124633.
- 570    51.    Hwang WY, Fu Y, Reyon D, Maeder ML, Tsai SQ, Sander JD, et al. Efficient genome editing  
571            in zebrafish using a CRISPR-Cas system. *Nat Biotechnol*. 2013 Mar 29;31(3):227–9.
- 572    52.    MonashBioinformaticsPlatform/RNAsik-pipe: JOSS ready [Internet]. Zenodo; 2018.  
573            Available from: <https://zenodo.org/record/1403976#.X5ks3IgzauI>
- 574    53.    Dobin A, Davis CA, Schlesinger F, Drenkow J, Zaleski C, Jha S, et al. STAR: ultrafast  
575            universal RNA-seq aligner. *Bioinformatics*. 2013 Jan 1;29(1):15–21.
- 576    54.    Yates AD, Achuthan P, Akanni W, Allen J, Allen J, Alvarez-Jarreta J, et al. Ensembl 2020.  
577            *Nucleic Acids Res*. 2019 Oct 28;gkz966.
- 578    55.    Liao Y, Smyth GK, Shi W. The R package Rsubread is easier, faster, cheaper and better  
579            for alignment and quantification of RNA sequencing reads. *Nucleic Acids Res*. 2019 May  
580            1;47(8).

- 581 56. drpowell/degust 4.1.1 [Internet]. Zenodo; 2019. Available from:  
582 <https://zenodo.org/record/3501067#.X5kV8ogzaUk>
- 583 57. Risso D, Ngai J, Speed TP, Dudoit S. Normalization of RNA-seq data using factor analysis  
584 of control genes or samples. *Nat Biotechnol*. 2014 Oct 28;32(9):896–902.
- 585 58. Robinson MD, McCarthy DJ, Smyth GK. edgeR: A Bioconductor package for differential  
586 expression analysis of digital gene expression data. *Bioinformatics*. 2009 Nov  
587 11;26(1):139–40.
- 588 59. Patro R, Duggal G, Love MI, Irizarry RA, Kingsford C. Salmon: fast and bias-aware  
589 quantification of transcript expression using dual-phase inference. *Nat Methods*. 2017  
590 Oct 28;14(4):417–9.
- 591 60. Nowicka M, Robinson MD. DRIMSeq: a Dirichlet-multinomial framework for multivariate  
592 count outcomes in genomics. *F1000Research*. 2016 Oct 28;5.
- 593

594 Figures

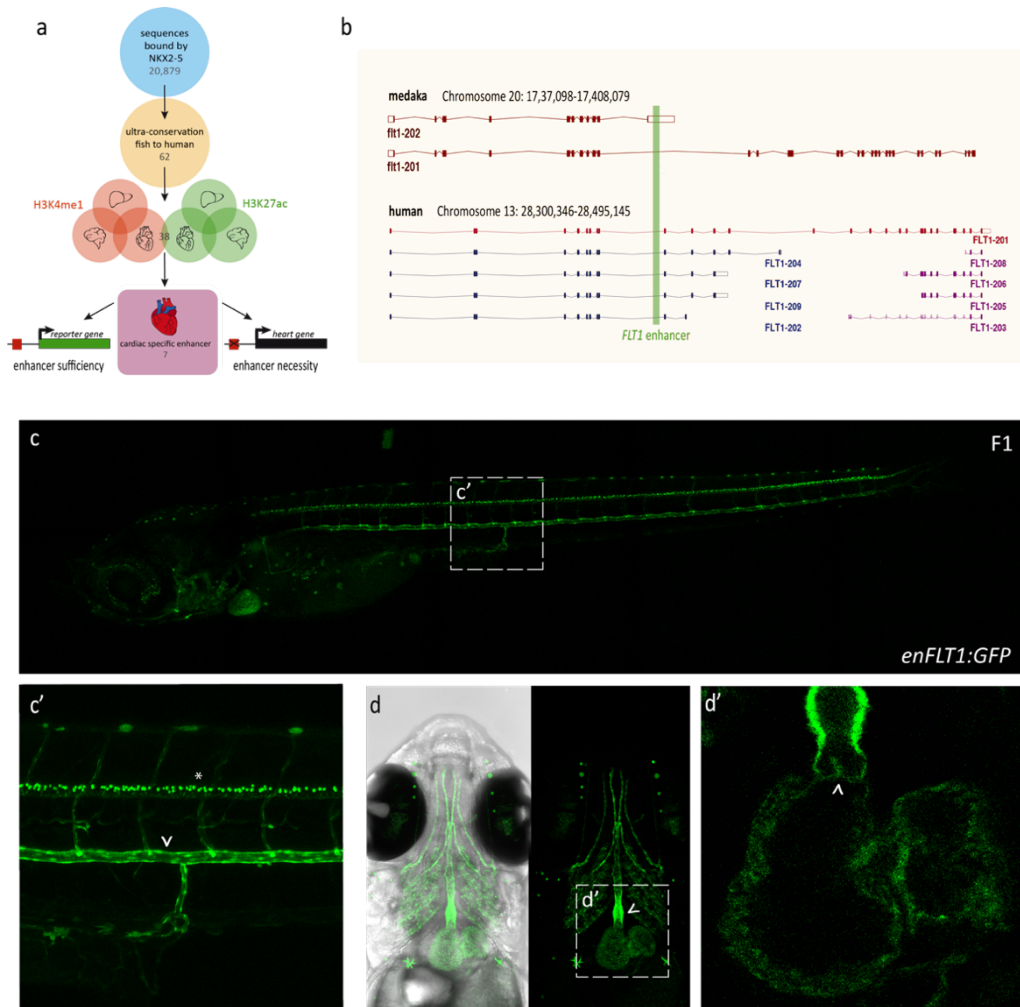

595

596 **Figure 1: Identification and validation of cardiac specific cis-regulatory elements.** a)

597 Bioinformatic pipeline to identify cardiac regulatory elements (RE) based on NKX2-5 binding,

598 sequence conservation and active histone marks (H3K4me1 and H3K27ac). Putative RE were

599 tested for the ability to drive reporter gene expression and the necessity for endogenous *FLT1*

600 expression. b) Overview of the *FLT1* locus and its isoforms in humans and medaka. The RE used

601 for *in vivo* transgenesis is displayed in green. c) *enFLT1* drives stable reporter gene (green

602 fluorescent protein (GFP)) expression in neurons (asterisk) and endothelium such as c') the

603 dorsal aorta (arrowhead) d) the outflow tract (arrowhead) d') and valves (arrowhead) in the

604 heart.

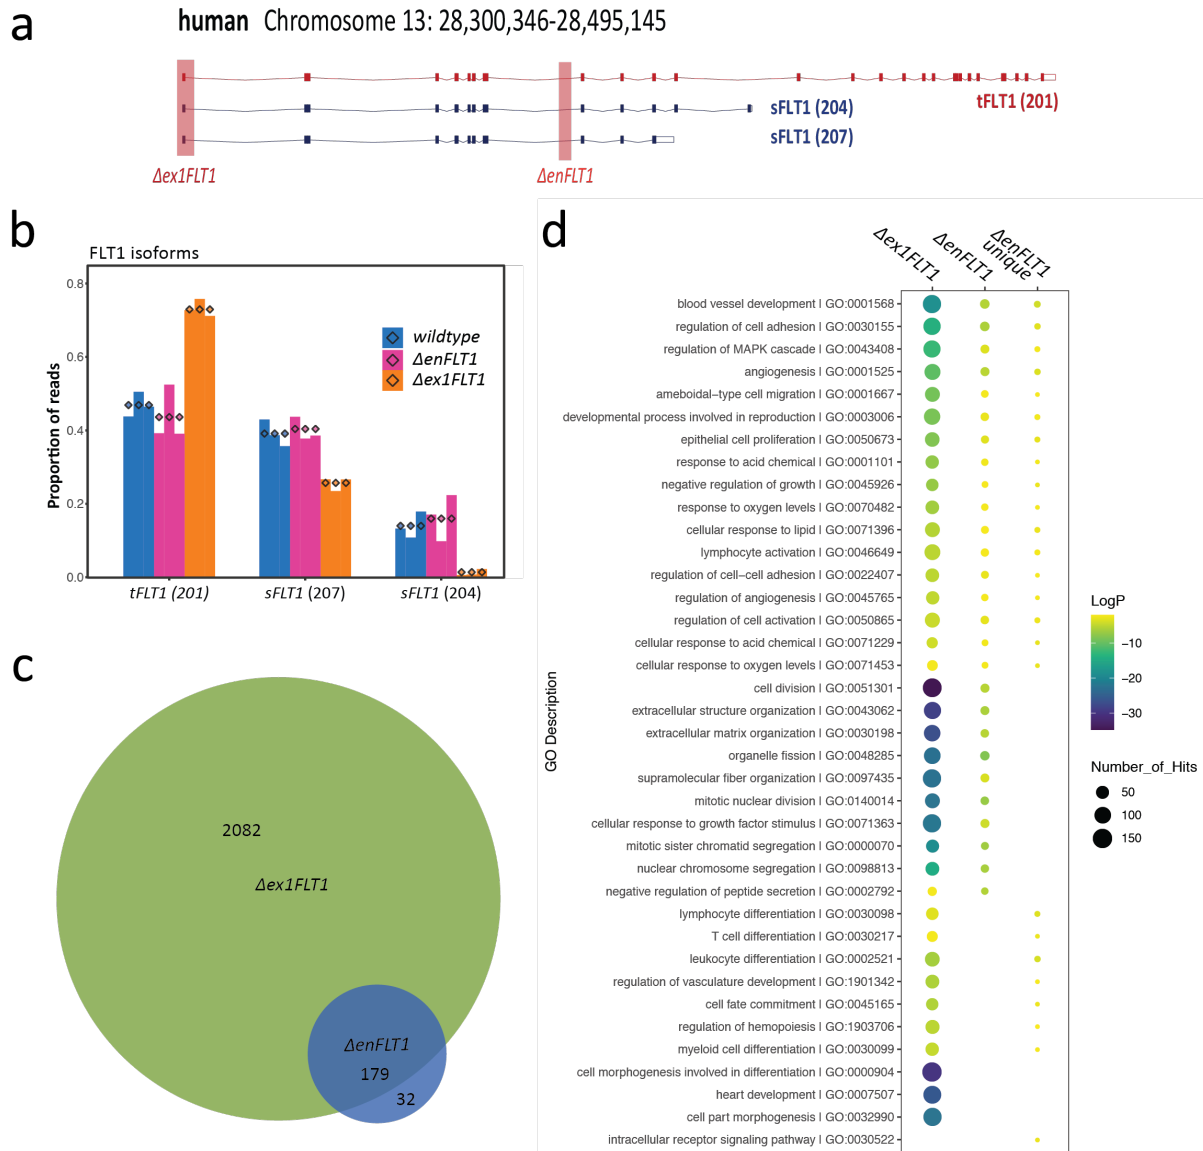

605

606

607

608

609

610

611

612

613

**Figure. 2: *enFLT1* is implemented in FLT1 related and alternative pathways.** a) Overview of the transmembrane bound FLT1 (tFLT1) and soluble FLT1 (sFLT1) isoforms. We generated a gene mutant ( $\Delta ex1FLT1$ ) and enhancer mutant ( $\Delta enFLT1$ ) cell line in human embryonic stem cells. b) Differentially expressed isoforms in *wildtype*,  $\Delta enFLT1$  and  $\Delta ex1FLT1$  cells. c) Venn diagram of differentially expressed genes (DEGs) (compared to wildtype) in  $\Delta enFLT1$  and  $\Delta ex1FLT1$ . The majority of DEGs in  $\Delta enFLT1$  overlaps with genes in  $\Delta ex1FLT1$ . d) Gene ontology of DEGs in  $\Delta ex1FLT1$ ,  $\Delta enFLT1$  and the 32 genes unique to enhancer mutant.

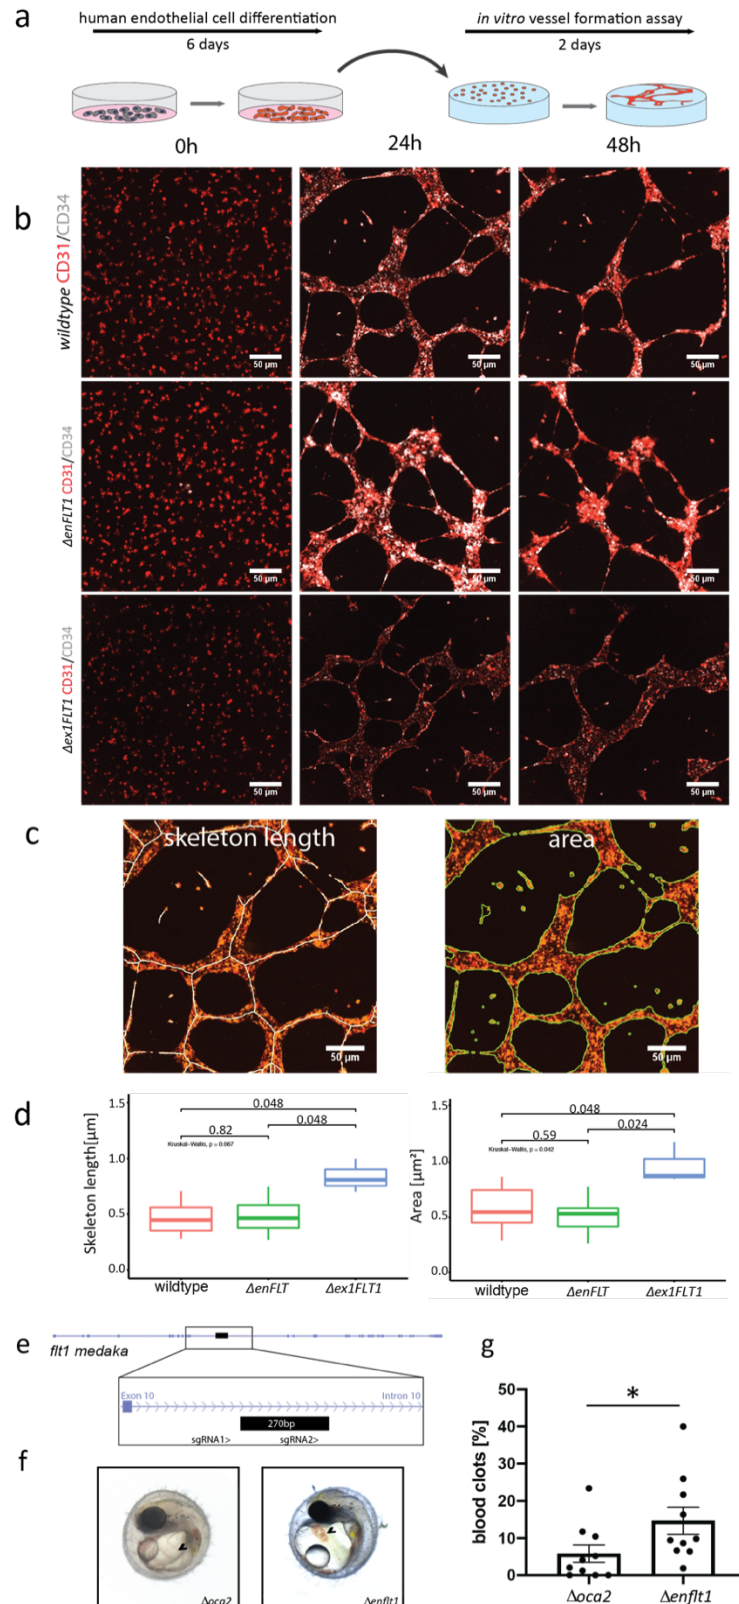

614

615 **Figure 3: Functional analysis of *enFLT1* during angiogenesis.** a) human embryonic stem cells

616 were differentiated within 6 days and subsequently used for angiogenesis assays and imaged

617 for 48 hours. b) Angiogenesis assays of wildtype,  $\Delta enFLT1$  and  $\Delta ex1FLT1$  cell lines at 0h, 24h,  
618 and 48h. All cell lines stayed positive for CD31 (red) and CD34 (grey) for 48h.  $\Delta ex1FLT1$  vessels  
619 maintained stronger connections and collapsed over time forming thicker vessels. c)  
620 CellPathfinder analysis of vessels based on skeleton length and area. d) Statistical analysis of  
621 normalised skeleton length and area covered over the course of the experiment.  $\Delta ex1FLT1$   
622 cells displayed longer connections and covered a significant larger area compared to wildtype  
623 and  $\Delta enFLT1$  cells. e) *flt1* locus and endogenous *enflt1* in medaka. 270bp were targeted with 2  
624 sgRNAs. f) Deletion of *enflt1* increased occurrence of blot clots ( $\Delta enflt1$ ) compared to control  
625 injections targeting *oca2* ( $\Delta oca2$ ) g) statistical analysis of blood clot occurrence. A significant  
626 difference ( $p= 0.0215$ ) of blood clot numbers were observed upon deletion of *enflt1* (14.68%)  
627 compared to controls (5.81%).

628

629 Supplementary data

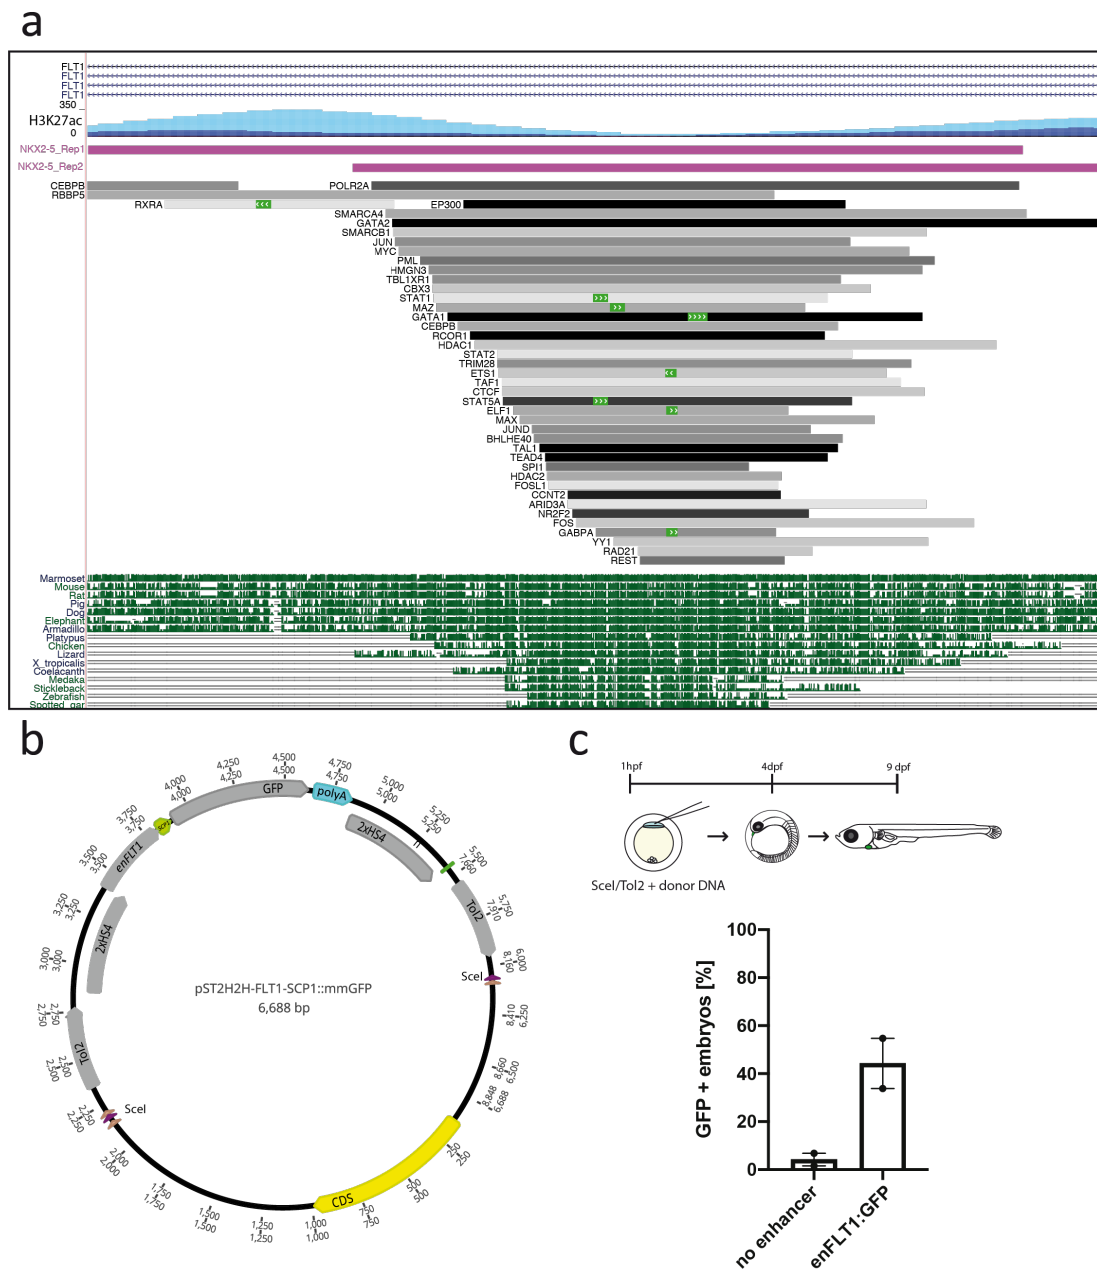

630

631 **Figure S1: In vivo validation of *enFLT1*.** a) Scheme of Transcription factor binding to *enFLT1*.

632 Transcription factor binding overlaps with highly a conserved sequence across species and a

633 valley between two H3K27ac activity marks suggesting open chromatin. b) Transgenesis assay

634 plasmid containing *enFLT1*. Control vector had no RE sequence inserted. c) Plasmids were in

635 injected in one cell stage medaka embryos. Occurrence of GFP expression was monitored until

636 hatching. Embryos injected with the plasmid containing *enFLT1* showed higher number of GFP

637 positive embryos compared to injection with a control vector without a putative RE.

638



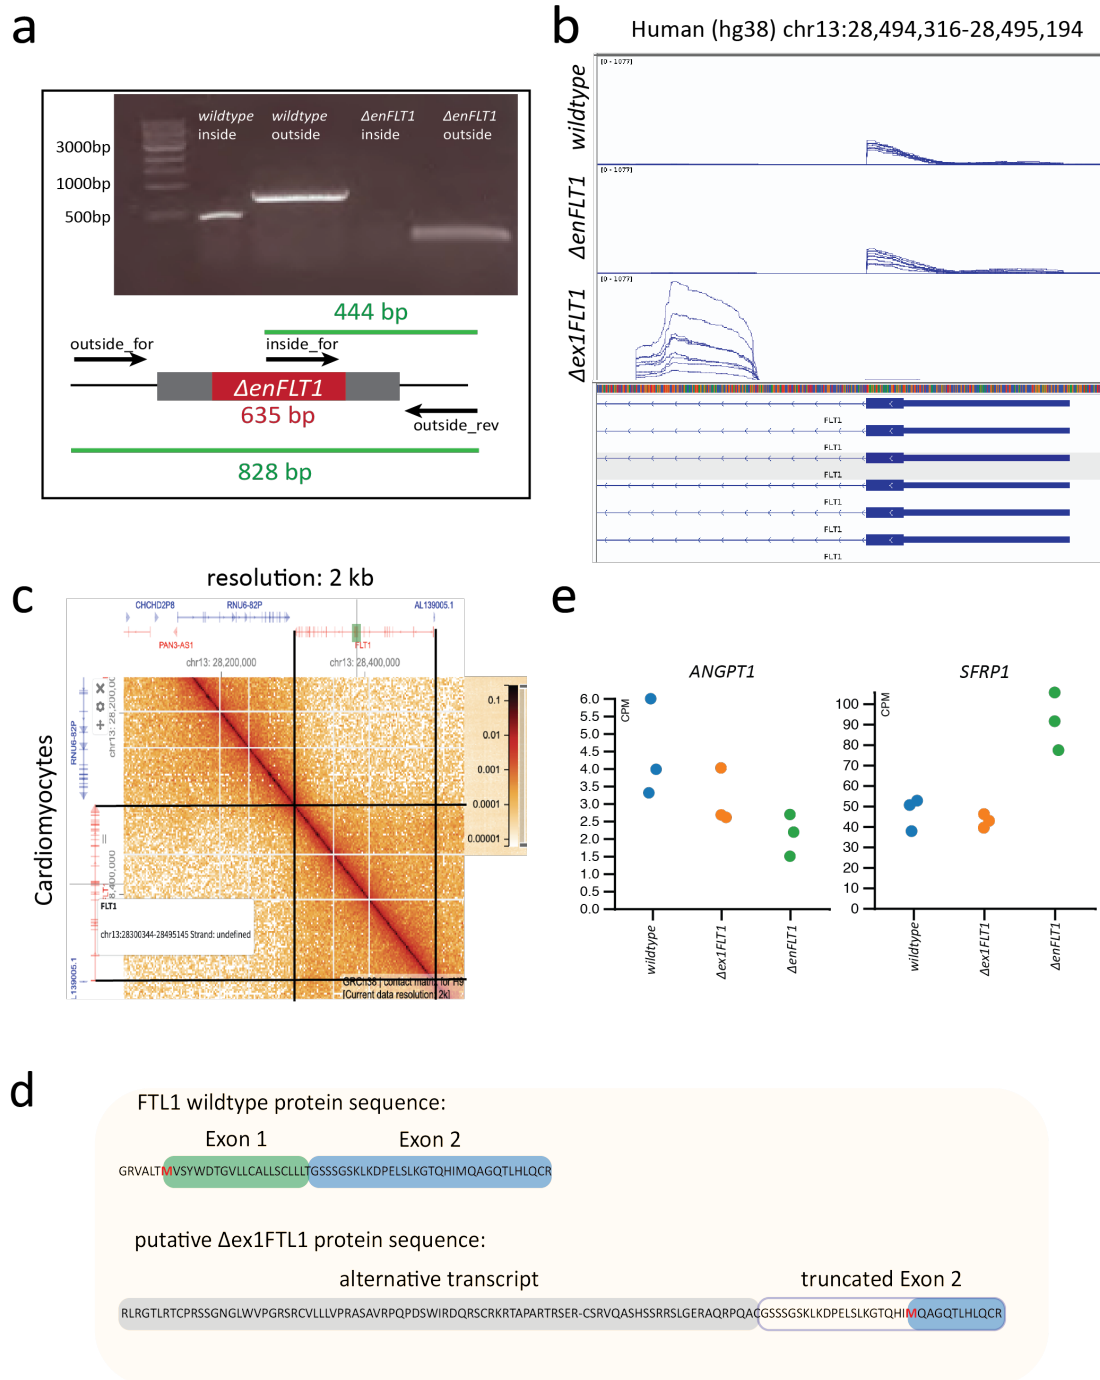

639

640 **Figure S2: Generation of  $\Delta enFLT1$  and  $\Delta ex1FLT1$  human embryonic stem cells.**

641 a) Screening PCR targeting the deleted RE in hESCs. 3 Primer PCR approach was used to amplify

642 gene edited locus. Band in  $\Delta enFLT1$  outside, was cut out and sent for sequencing. b) overview

643 of sequencing reads of exon 1 of *FLT1* in wildtype,  $\Delta enFLT1$  and  $\Delta ex1FLT1$  endothelial cells.

644 Expression of exon 1 has been disrupted in  $\Delta ex1FLT1$  and transcription starts at an alternative

645 start site. c) HiC interaction map of targets interacting with *enFLT1* in cardiomyocytes at 2kb

646 resolution. d) Predicted protein sequence of *FLT1* in wildtype and  $\Delta ex1FLT1$ . Alternative Start  
647 codon in Exon 2 might lead to a truncated protein in  $\Delta ex1FLT1$ . e) ANGPT1 and SFRP1 were  
648 identified from a list of 33 DEGs unique in  $\Delta enFLT1$  involved in blood vessel morphogenesis.

649

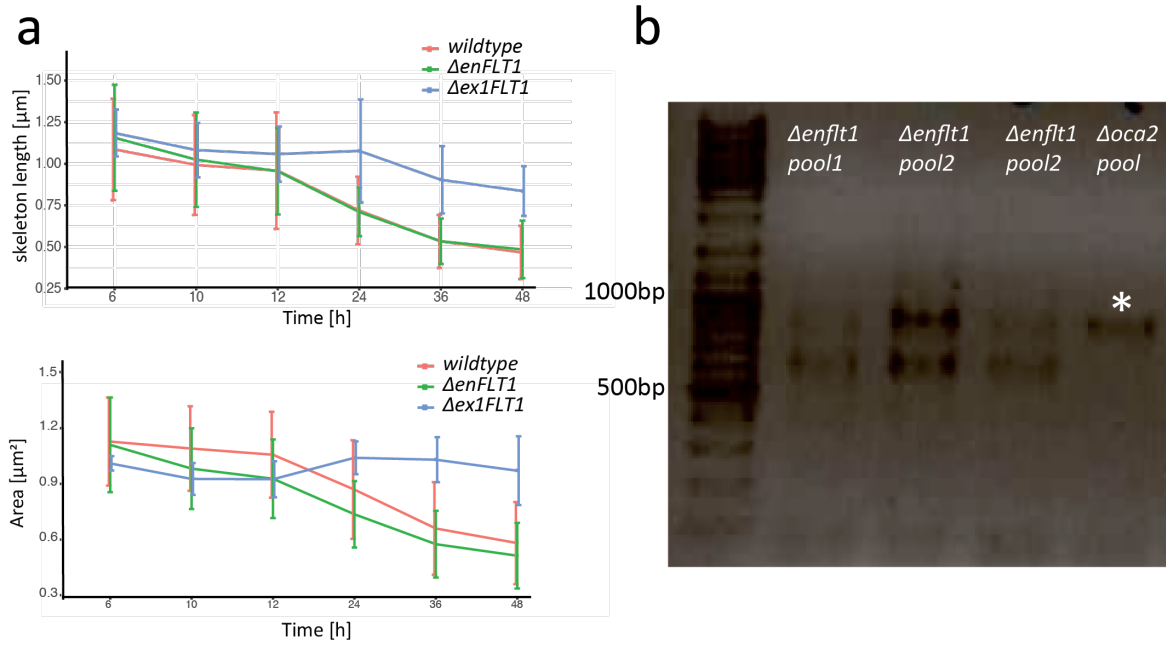

650

651 **Figure S3: *in vitro* and *in vivo* analysis of *enFLT1* deletion.** a) Assessment of normalised skeleton

652 length and area of vessels in angiogenesis assays. Length and area are significantly different in

653  $\Delta\text{ex1FLT1}$  compared to cell lines at 48h. b) Screening PCR of gene edited embryos injected with

654 CRISPR/Cas9 targeting the *enflt1* or *oca2*. Asterisk indicate the wildtype band at 879bp.

655 Excision of enhancer led to a band with a size of 634 bp. Samples contained pooled gDNA from

656 several injected embryos.

657

658 **Table S1:** List of putative regulatory elements identified via bioinformatic mining.

| <b>RE #</b> | <b>Coordinates (chromosome #; start; end) human hg19 assembly</b> |                     | <b>Location</b> | <b>Putative genes regulated by the RE (location of the RE with respect to the transcription start of the gene (in base pairs))</b> |
|-------------|-------------------------------------------------------------------|---------------------|-----------------|------------------------------------------------------------------------------------------------------------------------------------|
| <b>1</b>    | 3                                                                 | 71573754 71574438   | intronic        | FOXP1 (-394,108)                                                                                                                   |
| <b>2</b>    | 5                                                                 | 88129361 88130230   | intronic        | MEF2C (+70,103)                                                                                                                    |
| <b>3</b>    | 8                                                                 | 106341006 106341556 | intronic        | FOG2 (+10,361)                                                                                                                     |
| <b>4</b>    | 13                                                                | 28982241 28983259   | intronic        | FLT1 (+86,482)                                                                                                                     |
| <b>5</b>    | 15                                                                | 96808076 96808846   | intronic        | COUP-TFII (-65,485)                                                                                                                |
| <b>6</b>    | 16                                                                | 54540547 54541137   | intergenic      | IRX5 (-423,932), IRX3 (-220,167)                                                                                                   |
| <b>7</b>    | 21                                                                | 38807473 38807875   | intronic        | DYRK1A (+15,072)                                                                                                                   |

659
